# Supplementary material for: Tracking the contribution of inductive bias to individualised internal models
Source: PubMed Central journal article supplement (PMC9255757; doi:10.1371/journal.pcbi.1010182), 2022-06-22
Supplement: pcbi.1010182.s002.pdf [file pcbi.1010182.s002.pdf]

## S2 Appendix – Optimal prediction and the LATER model

A rational objective for human participants in a prediction task could be to minimize the expected response time. Let us denote the probabilities of the possible outcomes of a prediction task as  $p_i$ , the corresponding subjective probabilities (predictions) with  $\hat{p}_i$ . Then, according to the LATER model, we have:

$$\mathbb{E}_{p,r}(RT) = \sum_i p_i \cdot \mathbb{E}_r \left( \frac{\tau_0 - \log(\hat{p}_i)}{r} \right) = c_1 + c_2 \cdot \sum_i p_i \cdot (-\log(\hat{p}_i))$$

where we group quantities not depending on  $\hat{p}_i$  into constants  $c_1, c_2$ .

Note that the quantity we obtained at the end is the cross-entropy between the actual probabilities and the subjective probabilities.

We can take this further, note that the entropy of the actual probabilities,  $H(p_i)$  does not depend on the participant's predictions, therefore we can also subtract this:

$$\sum_i p_i \cdot (-\log(\hat{p}_i)) + p_i \cdot \log(p_i) = D_{KL}(P, \hat{P})$$

This is the Kullback-Leibler divergence between the actual probabilities ( $P$ ) and the subjective probabilities ( $\hat{P}$ ). Therefore expected response times are minimized exactly when the subjective probabilities match the actual probabilities.
